# Supplementary material for: Non-Invasive Continuous Respiratory Monitoring on General Hospital Wards: A Systematic Review
Source: PubMed Central journal article supplement (PMC4684230; doi:10.1371/journal.pone.0144626), 2015-12-14
Supplement: pone.0144626.s002.pdf [file pone.0144626.s002.pdf]

## Checklist for Intervention research. Systematic Review Monitoring

Title .....

Author .....Device.....

Journal, publication date .....

Reviewer.....Date.....

| Relevance                                                                                                                  | Yes | No | Unclear |
|----------------------------------------------------------------------------------------------------------------------------|-----|----|---------|
| 1. Is the spectrum of patients representative of a general hospital ward population?                                       | ()  | () | ()      |
| 2. Provides the investigated device or system decision support, analyzing the signals to present state a patients' health? | ()  | () | ()      |
| 3. Is the monitoring device wireless?                                                                                      | ()  | () | ()      |
| 4. Is the monitoring device contactless?                                                                                   | ()  | () | ()      |
| 5. Is the test device easily applicable in low care clinical practice?                                                     | ()  | () | ()      |

### Validity

#### Quality/ design

|                                                                                                                   |    |    |    |
|-------------------------------------------------------------------------------------------------------------------|----|----|----|
| 5. Randomized allocation?                                                                                         | () | () | () |
| 6. Sampling: Cohort / Case-Control / Case series / other .....                                                    |    |    | () |
| 7. Was the sample size calculation preformed?                                                                     | () | () | () |
| 8. Was the method of recruitment/sampling systematically performed?                                               | () | () | () |
| 9. Were primary and secondary outcome measures clearly predefined?                                                | () | () | () |
| 10. Time span: How long was the intervention delivered? .....                                                     |    |    | () |
| 11. Who assessed/ acted on the initial results from the monitor? .....                                            |    |    | () |
| 12. Who was blinded to the study condition assignment? Participants / care providers / those assessing outcomes * |    |    | () |
| 13. Statistical method to compare groups for outcomes: .....                                                      |    |    | () |

#### Quality / study execution

|                                                      |    |    |    |
|------------------------------------------------------|----|----|----|
| 14. Population, setting: .....                       |    |    | () |
| 15. When was the study performed (Date) .....        |    |    | () |
| 16. Participants. Baseline characteristics reported? | () | () | () |

|             | Patients | Age | Male |  |  |  |
|-------------|----------|-----|------|--|--|--|
| Study group |          |     |      |  |  |  |
| Usual care  |          |     |      |  |  |  |

|                                                                                                                         |    |    |    |
|-------------------------------------------------------------------------------------------------------------------------|----|----|----|
| 17. Index monitor, name: .....                                                                                          |    |    | () |
| 18. Method of respiratory observation (e.g. pulse oximetry): .....                                                      |    |    | () |
| 19. Measurement (e.g. humidity in expired air): .....                                                                   |    |    | () |
| 20. Sensor placement (e.g. on the ear):.....                                                                            |    |    | () |
| 21. Additional vital sign measurements (e.g. HR):.....                                                                  |    |    | () |
| 22. Was standardized care applied at all times?                                                                         | () | () | () |
| 23. Were any other health care changes made along with the introduction of the monitoring system?                       | () | () | () |
| 24. Primary endpoint .....                                                                                              |    |    | () |
| Secondary endpoints .....                                                                                               |    |    | () |
| 25. Was the flow of participants through each stage clear: enrollment, assignment, allocation, intervention, follow-up? | () | () | () |
| Enrollment: ..... (no. participants screened for eligibility)                                                           |    |    | () |
| Assignment: ..... (no. participants assigned to a condition)                                                            |    |    | () |
| Intervention exposure: ..... (no. participants receiving each intervention)                                             |    |    | () |
| Follow-up ..... (no. participants who completed follow-up)                                                              |    |    | () |

\* delete what is not applicable

*Checklist Systematic Review Continuous Monitoring in general hospital wards.  
Based on the CONSORT and TREND checklist.*

|                                                                                | Yes | No | Unclear |
|--------------------------------------------------------------------------------|-----|----|---------|
| 26. Was a summary of results provided for each primary- and secondary outcome? | ()  | () | ()      |
| 27. Mortality .....                                                            |     |    | ()      |
| 28. ICU admission .....                                                        |     |    | ()      |
| 29. Length of hospital stay .....                                              |     |    | ()      |
| 30. Length of ICU stay .....                                                   |     |    | ()      |
| 31. Cardiopulmonary arrests .....                                              |     |    | ()      |
| 32. Other:.....                                                                |     |    | ()      |

*Quality / article*

|                                                                       |    |    |    |
|-----------------------------------------------------------------------|----|----|----|
| 33. Is the research question clearly stated?                          | () | () | () |
| 34. Is the target population and study sample clearly described?      | () | () | () |
| 35. Is the intervention clearly described to allow replication?       | () | () | () |
| 36. Is the data acquisition described sufficiently?                   | () | () | () |
| 37. Were the results/ outcomes clearly and correctly reported?        | () | () | () |
| 38. Were the indeterminate results (artifacts) and outliers reported? | () | () | () |
| 39. Were the results discussed taking into account                    | () | () | () |
| -the trial limitations?                                               | () | () | () |
| -generalisability?                                                    | () | () | () |
| -benefit and harms?                                                   | () | () | () |

## Checklist for diagnostic studies. Systematic Review Monitoring

Title .....

Author .....Device.....

Journal, publication date .....

Reviewer.....Date.....

| <b>Relevance</b>                                                                                                           | Yes | No | Unclear |
|----------------------------------------------------------------------------------------------------------------------------|-----|----|---------|
| 1. Is the spectrum of patients representative of a general hospital ward population?                                       | ()  | () | ()      |
| 2. Provides the investigated device or system decision support, analyzing the signals to present state a patients' health? | ()  | () | ()      |
| 3. Is the monitoring device wireless?                                                                                      | ()  | () | ()      |
| 4. Is the monitoring device contactless?                                                                                   | ()  | () | ()      |
| 5. Is the test device easily applicable in low care clinical practice?                                                     | ()  | () | ()      |

### Validity

#### Quality / design

|                                                                                                                                  |    |    |    |
|----------------------------------------------------------------------------------------------------------------------------------|----|----|----|
| 6. Diagnostic accuracy / comparing accuracy between tests / methods-comparison*                                                  |    |    | () |
| 7. Sampling: Cohort / Case-Control / Case Series / other: ..... *                                                                |    |    | () |
| 8. Was a sample size calculation performed?                                                                                      | () | () | () |
| 9. Was the method of recruitment/sampling performed systematically?                                                              | () | () | () |
| 10. Were cutoff points (normal vs. abnormal) or categories of both reference test and investigated device determined previously? | () | () | () |
| 11. Were the reference measurements performed simultaneously with the index measurements (cross-sectional)?                      | () | () | () |
| 12. Blinding of the index monitor?                                                                                               | () | () | () |
| 13. Blinding of the reference monitor?                                                                                           | () | () | () |

#### Quality/ study execution

|                                                      |    |    |    |
|------------------------------------------------------|----|----|----|
| 14. Population, setting: .....                       |    |    | () |
| 15. When was the study performed (Date) .....        |    |    | () |
| 16. Participants, baseline characteristics reported? | () | () | () |

|       | Patients | Age | Male |  |  |  |
|-------|----------|-----|------|--|--|--|
| No. % |          |     |      |  |  |  |

|                                                                                                   |    |    |    |
|---------------------------------------------------------------------------------------------------|----|----|----|
| 17. Index monitor, name: .....                                                                    |    |    | () |
| 18. Method of respiratory observation (e.g. pulse oximetry): .....                                |    |    | () |
| 19. Measurement (e.g. humidity in expired air): .....                                             |    |    | () |
| 20. Sensor placement (e.g. on the ear):.....                                                      |    |    | () |
| 21. Additional vital sign measurements (e.g. HR):.....                                            |    |    | () |
| 22. Reference test:.....                                                                          |    |    | () |
| 23. Was standardized care applied at all times?                                                   | () | () | () |
| 24. Were any other health care changes made along with the introduction of the monitoring system? | () | () | () |

|                                     |    |    |    |
|-------------------------------------|----|----|----|
| 25. Is a cross tabulation reported? | () | () | () |
|-------------------------------------|----|----|----|

|       | Ref+ | Ref- |
|-------|------|------|
| Test+ |      |      |
| Test- |      |      |

|                                                                  |    |    |    |
|------------------------------------------------------------------|----|----|----|
| 26. Is diagnostic accuracy and statistical uncertainty reported? | () | () | () |
|------------------------------------------------------------------|----|----|----|

| Sens | Spec | PPV | NPV | LR+ | LR- |
|------|------|-----|-----|-----|-----|
|      |      |     |     |     |     |

|                                                                                |    |    |    |
|--------------------------------------------------------------------------------|----|----|----|
| 27. If comparability between tests is tested: Is a Bland Altman analysis done? | () | () | () |
|--------------------------------------------------------------------------------|----|----|----|

| Mean | SD | -limit | +limit |
|------|----|--------|--------|
|      |    |        |        |

*Checklist Systematic Review Continuous Monitoring on general hospital wards.  
Based on the STARD Checklist*

*Quality / article*

- |                                                                       |     |     |     |
|-----------------------------------------------------------------------|-----|-----|-----|
| 28. Is the research question clearly stated?                          | ( ) | ( ) | ( ) |
| 29. Is the target population and study sample clearly described?      | ( ) | ( ) | ( ) |
| 30. Is the index monitor clearly described?                           | ( ) | ( ) | ( ) |
| 31. Is the reference monitor clearly described?                       | ( ) | ( ) | ( ) |
| 32. Is the data acquisition described sufficiently?                   | ( ) | ( ) | ( ) |
| 33. Were the results/ outcomes clearly and correctly reported?        | ( ) | ( ) | ( ) |
| 34. Were the indeterminate results (artifacts) and outliers reported? | ( ) | ( ) | ( ) |
| 35. Is clinical applicability of study findings reported?             | ( ) | ( ) | ( ) |

*\* delete what is not applicable.*
