# Supplementary material for: Non-Invasive Continuous Respiratory Monitoring on General Hospital Wards: A Systematic Review
Source: PubMed Central journal article supplement (PMC4684230; doi:10.1371/journal.pone.0144626), 2015-12-14
Supplement: pone.0144626.s003.pdf [file pone.0144626.s003.pdf]

**S3 File. Modified assessment tool to describe study quality**

|        |         |           |
|--------|---------|-----------|
| Title: | Author: | Reviewer: |
|--------|---------|-----------|

|                                                                                                                     | +/- |                                                                                                       | +/- |
|---------------------------------------------------------------------------------------------------------------------|-----|-------------------------------------------------------------------------------------------------------|-----|
| <b>Diagnostic study</b>                                                                                             |     | <b>Intervention study</b>                                                                             |     |
| 1. Spectrum of patients was representative of target population (1.1)                                               |     | Spectrum of patients representative of target population (4.1)                                        |     |
| 2. Patients sampling method is a consecutive series of participants (cohort) (2.5)                                  |     | Method to assign units to study conditions was randomized allocation (3.3, 4.8)                       |     |
| 3. Reference standard likely to classify target condition (1.3, 2.7)                                                |     | Completely predefined primary and secondary outcome measures (3.6, 4.6)                               |     |
| 4. Execution of the index test was described in sufficient detail to permit replication (1.8, 2.8, 2.9)             |     | Sufficient reporting on interventions for each group to allow replication (3.5, 4.4)                  |     |
| 5. Results from both index monitor and reference standard were interpreted separately (blinding) (1.10, 1.11, 2.11) |     | Those assessing the outcomes were blinded to study condition assignment (3.11a, 4.9)                  |     |
| 6. The whole sample or a random selection of the sample received verification by a reference standard (1.5)         |     | Analysis strategy was "Intention to treat" (3.16, 4.16)                                               |     |
| 7. Demographic characteristics of the study population (2.15)                                                       |     | Baseline characteristics for each study condition (3.15, 4.14)                                        |     |
| 8. Report estimates of diagnostic accuracy and measures of statistical uncertainty (2.21)                           |     | For each primary and secondary outcome results were summarized for each study condition (3.17a, 4.17) |     |
| 9. Withdrawals from the study were explained (1.14, 2.16)                                                           |     | Lost to follow-up and exclusions after assignment were reported and explained (3.13b, 4.19)           |     |
| 10. Discusses the clinical applicability of the study findings (2.25)                                               |     | Discusses limitations, generalizability, interpretation (3.20-22, 4.20-22)                            |     |

References with paragraphs from available methodological quality assessment tools:  
 1. QUADAS tool, 2. STARD checklist, 3. CONSORT checklist, 4. TREND statement.
