# Supplementary material for: Non-Invasive Continuous Respiratory Monitoring on General Hospital Wards: A Systematic Review
Source: PubMed Central journal article supplement (PMC4684230; doi:10.1371/journal.pone.0144626), 2015-12-14
Supplement: pone.0144626.s004.pdf [file pone.0144626.s004.pdf]

**S4 File. References (50 articles) that were not included in the systematic review.** "Non-invasive continuous respiratory monitoring on general hospital wards: A systematic review."

1. Banks J, McArthur J, Gordon G. Flexible monitoring in the management of patient care processes: a pilot study. *Lippincotts Case Manag* 2000;5(3):94,103; 104-6.

*Reason not included= no full text available. Author request per email without reply.*

2. Bellomo R, Ackerman M, Bailey M, Meale R, Clancy G, Danesh, et al. A controlled trial of electronic automated advisory vital signs monitoring in general hospital wards. *Crit Care Med* 2012; 40(8):2349-61.

*Reason not included= although suspected, automated does not mean continuous monitoring.*

3. Bowdle TA. Nocturnal arterial oxygen desaturation and episodic airway obstruction after ambulatory surgery. *Anesth Analg* 2004; 99(1):70-6.

*Reason not included= outcome was not defined as abnormal vital signs/SAE, as the monitor was not subject of study.*

4. Bowton DL, Scuderi PE, Harris L, Haponik EF. Pulse oximetry monitoring outside the intensive care unit: progress or problem? *Ann Intern Med* 1991; 115(6):450-4.

*Reason not included= study performed outside the general hospital ward*

5. Bradley BD, Green G, Ramsay T, Seely AJE. Impact of sedation and organ failure on continuous heart and respiratory rate variability monitoring in critically ill patients: A pilot study. *Critical Care Medicine* 2013;41(2):433-44

*Reason not included= study performed outside the general hospital ward*

6. Campana LM, George E, Freeman J, Ladd D, MacNabb C, Lee JC, Voscopoulos C. The use of noninvasive respiratory volume monitoring to assess obstructive sleep apnea in the post-anesthesia care unit. *Anesthesia and Analgesia* 2013;116(SUPPL1):

*Reason not included= study performed outside the general hospital ward*

7. Christensen M, Lie C, Rosenberg J. Continuous pulse oximetry in the general surgical ward: Nellcor N-200 versus Nellcor N-3000. *Anaesthesia* 1999 54(3):253-7.

*Reason not included= outcome was not defined as abnormal vital signs/SAE, as the monitor was not subject of study.*

*But the outcome was defined as the percentage of false alarms for different signal analysis algorithms.*

8. Ciccone A, Celani MG, Chiamonte R, Rossi C, Righetti E. Continuous versus intermittent physiological monitoring for acute stroke. *Cochrane Library* 2013.

*Reason not included= study performed outside the general hospital ward*

9. Delerme S, Freund Y, Renault R, Devilliers C, Castro S, Chopin S, et al. Concordance between capnography and capnia in adults admitted for acute dyspnea in an ED. *Am J Emerg Med* 2010;28(6):711-4.

*Reason not included= study performed outside the general hospital ward*

10. Di Rienzo M, Rizzo F, Meriggi P, Bordoni B, Brambilla G, Ferratini M, et al. Applications of a textile-based wearable system for vital signs monitoring. *Conf Proc IEEE Eng Med Biol Soc* 2006;1:2223-6.

*Reason not included= not an original article, and was not performed on a general hospital ward but in healthy volunteers.*

11. Egleston CV, Ben Aslam H, Lambert MA. Capnography for monitoring non-intubated spontaneously breathing patients in an emergency room setting. *J Accid Emerg Med* 1997;14(4):222-4.

*Reason not included= study performed outside the general hospital ward*

12. Elliott M, Tate R, Page K. Do clinicians know how to use pulse oximetry? A literature review and clinical implications. *Aust Crit Care* 2006;19(4):139-44.

*Reason not included= not an original article.*

13. Federico N, Federico T, Federico F, Sternik G, Taghizadeh F, Esmaeli-Azad B. Miniaturized wearable sensors for wireless realtime vital sign recordings cloud based data transfer storage and analysis. *FASEB Journal* 2014;28(1):

*Reason not included= not an original article*

14. Freeman J, Lalli M, Yocum N, Panasyuk A, Panasyuk S, Lew R. Non-invasive monitoring of tidal volume and minute ventilation in non-intubated patients. *Critical Care Medicine* 2011;39(SUPPL12):88

*Reason not included= study performed outside the general hospital ward*

15. Hall D, Gibson K, Morley D, Wylie M, Rae S. Increasing the effective use of capnography in recovery: A multi-faceted trainee-delivered approach to quality improvement in anaesthesia. *Anaesthesia* 2014;69(SUPPL3):14

*Reason not included= study performed outside the general hospital ward*

16. Heaney LM. Cardiac and respiratory monitoring of acute stroke patients. *Heart Lung* 1977;6(3):469-74.

*Reason not included= study performed outside the general hospital ward*

17. Janssens JP, Perrin E, Bennani I, De Muralt B, Titelion V, Picaud C. Is continuous transcutaneous monitoring of PCO<sub>2</sub> (TcPCO<sub>2</sub>) over 8 h reliable in adults? *Respir Med* 2001;95(5):331-5

*Reason not included= study performed outside the general hospital ward*

18. Kelly A, Klim S. Agreement between arterial and transcutaneous PCO<sub>2</sub> in patients undergoing non-invasive ventilation. *Respir Med* 2011; 105(2):226-9

*Reason not included= study performed outside the general hospital ward*

19. Krieger BP. Ventilatory pattern monitoring: Instrumentation and applications. *Respir Care* 1990; 35(7):697-708

*Reason not included= study performed outside the general hospital ward*

20. Krieger B, Feinerman D, Zaron A, Biszousky F. Continuous noninvasive monitoring of respiratory rate critically ill patients. *Chest* 1986; 90(5):632-4.

*Reason not included= study performed outside the general hospital ward*

21. LeGrand TS, Peters JI. Pulse oximetry: Advantages and pitfalls. *J Respir Dis* 1999;20(3):195-206.

*Reason not included= not an original article.*

22. Lim BL, Kelly AM. How useful is transcutaneous carbon dioxide monitoring in the adult emergency department?. *Hong Kong J Emerg Med* 2010;17(1):82-4.

*Reason not included= study performed outside the general hospital ward*

23. MacNabb CM, Brayonov J, Freeman J, George E. Developing a protocol utilizing non-invasive respiratory volume monitoring to identify patients at risk for opioid induced respiratory depression. *Circulation* 2013;128(22):

*Reason not included= not an original article, and the study was not performed on a general hospital ward but on the PACU.*

24. Majewski W.D. An analysis of selected vital function parameters in patients undergoing anesthesia for laparoscopic and open prostatectomy. *Surgical Endoscopy and Other Interventional Techniques* 2014;28(SUPPL1):S173

*Reason not included= study performed outside the general hospital ward*

25. Maki H, Ogawa H, Tsukamoto S, Yonezawa Y, Caldwell WM. A system for monitoring cardiac vibration, respiration, and body movement in bed using an infrared. *Conf Proc IEEE Eng Med Biol Soc* 2010:5197-200.

*Reason not included= no full text available. Author request sent by email without any reply.*

26. Maniscalco M, Zedda A, Faraone S, Carratu P, Sofia M. Evaluation of a transcutaneous carbon dioxide monitor in severe obesity. *Intensive Care Med* 2008;34(7):1340-4.

*Reason not included= study performed outside the general hospital ward*

27. Mestek M., Addison P., Neitenbach A.-M., Bergese S., Kelley S. Accuracy of continuous noninvasive respiratory rate derived from pulse oximetry in congestive heart failure patients. *Chest* 2012;142(4)

*Reason not included= not an original article*

28. Mestek M.L., Ochs J.P., Addison P.S., Neitenbach A.-M., Bergese S.D., Kelley S.D. Accuracy of continuous non-invasive respiratory rate derived from pulse oximetry in patients with high respiratory rates. *Anesthesia and Analgesia* 2013 117 SUPPL. 1 (49-)

*Reason not included= not an original article, study was partly performed in patients on the emergency department.*

29. Mimoz O, Benard T, Gaucher A, Frasca D, Debaene B. Accuracy of respiratory rate monitoring using a non-invasive acoustic method after general anaesthesia. *British Journal of Anaesthesia* 2012 108:5 (872-875)

*Reason not included= study performed outside the general hospital ward*

30. Miyamoto Y, Yonezawa Y, Maki H, Ogawa H, Hahn AW, Caldwell WM. A system for monitoring heart pulse, respiration and posture in bed. *Biomed Sci Instrum* 2002;38:135-8. *Reason not included= no full text available.*

31. Mohr N.M., Wessman B. Continuous capnography should be used for every emergency department procedural sedation. *Annals of Emergency Medicine* 2013 61:6 (697-698)  
*Reason not included= study performed outside the general hospital ward*
32. Morel G.L., Mahul P., Reche M., Viale J.P., Auboyer C., Geysant A., Roche F., Barthelemy J.C., Pichot V. Real-time diaphragmatic electromyogram denoising using wavelet in intensive care unit and anesthesia. *Fundamental and Clinical Pharmacology* 2013 27 SUPPL. 1 (86-)  
*Reason not included= study performed outside the general hospital ward*
33. Muders T, Luepschen H, Putensen C. Impedance tomography as a new monitoring technique. *Curr Opin Crit Care* 2010;16(3):269-75.  
*Reason not included= study performed outside the general hospital ward*
34. Nikkola EM, Leino KA, Takala RSK, Kirvela OA, Salonen MAO. The validity of the static-charge-sensitive bed in the detection of fentanyl-induced respiratory depression. *Acta Anaesthesiol Scand* 2004;48(3):371-6.  
*Reason not included= study performed outside the general hospital ward*
35. Orphanidou C, Clifton D, Khan S, Smith M, Feldmar J, Tarassenko L. Telemetry-based vital sign monitoring for ambulatory hospital patients. *Conf Proc IEEE Eng Med Biol Soc* 2009:4650-3.  
*Reason not included= not an original article, the study was performed outside the general hospital ward*
36. Overdyk FJ, Carter R, Maddox RR, Callura J, Herrin AE, Henriquez C. Continuous oximetry/capnometry monitoring reveals frequent desaturation and bradypnea during patient-controlled analgesia. *Anesth Analg* 2007;105(2):412-8.  
*Reason not included= outcome was not defined as abnormal vital signs/SAE*
37. Orr J, Long C, Brewer LA CO(2) waveform generator use in evaluating capnometer performance using previously recorded clinical data. *Anesthesia and Analgesia* 2012;115(2):S11  
*Reason not included= study performed outside the general hospital ward, and outcome was not defined as abnormal vital signs/SAE.*
38. Palace ZJ, Mendelson G, Thaler MF, Margel A. The effect of a continuous patient monitoring system on reducing hospitalizations in the nursing home. *Journal of the American Geriatrics Society* 2013;61(SUPPL1):S68  
*Reason not included= study performed outside the general hospital ward*
39. Pinna GD, Robbi E, Pizza F, Taurino AE, Pronzato C, La Rovere MT, Maestri R. Comparison between type 2 and type 3 portable monitoring in the assessment of sleep-disordered breathing in heart failure patients. *European Journal of Heart Failure* 2012;11(SUPPL1):S30  
*Reason not included= outcome was not defined as abnormal vital signs/SAE*
40. Pedersen T, Hovhannisyan K, Møller AM, Smith AF, Lewsi SR. Pulse oximetry for perioperative monitoring. *Cochrane Library* 2009.  
*Reason not included= study performed outside the general hospital ward*
41. Rowan C, Ahmed S, Hedlund T., Speicher R. Continuous capnography decreases the utilization of blood gases. *Critical Care Medicine* 2011;39(SUPPL12):91  
*Reason not included= study performed outside the general hospital ward*
42. Ruiz-Rodriguez JC, Ruiz-Sanmartin A, Ribas V, Caballero J, Garcia-Roche A, Riera J, et al. Innovative continuous non-invasive cuffless blood pressure monitoring based on photoplethysmography technology. *Intensive Care Medicine* 2013;39(9):1618-25.  
*Reason not included= study performed outside the general hospital ward*
43. Slight SP, Franz C, Olugbile M, Brown HV, Bates DW, Zimlichman E. Cost savings attributable to a continuous monitoring system in a medical-surgical unit. *Journal of General Internal Medicine* 2013;28(SUPPL1):S54  
*Reason not included= not an original article, as the data used was from a before-and after controlled study described in another (selected) paper.*
44. Soto RG, Davis M, Faulkner MJ. A comparison of the incidence of hypercapnea in non-obese and morbidly obese peri-operative patients using the SenTec transcutaneous pCO(2) monitor. *Journal of Clinical Monitoring and Computing* 2014;28(3):293-8  
*Reason not included= outcome was not defined as abnormal vital signs/SAE*

45. Srinivasa V, Kodali BS. Capnometry in the spontaneously breathing patient. *Curr Opin Anaesthesiol* 2004;17(6):517-20.  
*Reason not included= not an original article*
46. Taenzer AH, Pyke J, Herrick MD, Dodds TM, McGrath SP. A comparison of oxygen saturation data in inpatients with low oxygen saturation using automated continuous monitoring and intermittent manual data charting. *Anesth Analg* 2014;  
*Reason not included= outcome was not defined as abnormal vital signs/SAE*
47. Uemura K, Hayashi H, Tsubaki K, Egawa J, Inoue S, Furuya H, Kawaguchi M. Use of acoustic respiratory rate monitoring equipment Rad-87 in patients undergoing awake craniotomy. *Journal of Neurosurgical Anesthesiology* 2013;25(4):508  
*Reason not included= study performed outside the general hospital ward*
48. Voepel-Lewis T, Parker ML, Burke CN, Hemberg J, Perlin L, Kai S, Ramachandran SK. Pulse oximetry desaturation alarms on a general postoperative adult unit: a prospective observational study of nurse response time. *Int J Nurs Stud* 2013;  
*Reason not included= outcome was not defined as abnormal vital signs/SAE*
49. Voskopoulos C., Freeman J., Ladd D., Braynov J.B., MacNabb C., George E. Use of a non-invasive respiratory volume monitor to identify opioid induced respiratory depression in the postanesthesia care unit. *Anesthesia and Analgesia* 2013;116(SUPPL1)  
*Reason not included= study performed outside the general hospital ward*
50. Waldschmitt E, Smith H, Abosaida A. In-clinic evaluation of home respiratory equipment and treatment adherence in cystic fibrosis patients. *Pediatric Pulmonology* 2014;49(SUPPL38):358-9  
*Reason not included= study performed outside the general hospital ward*
